# Supplementary material
Source: PubMed Central journal article supplement (PMC2705023)
Supplement: pp.109.139378_1.pdf [file pp.109.139378_1.pdf]

Figure S1

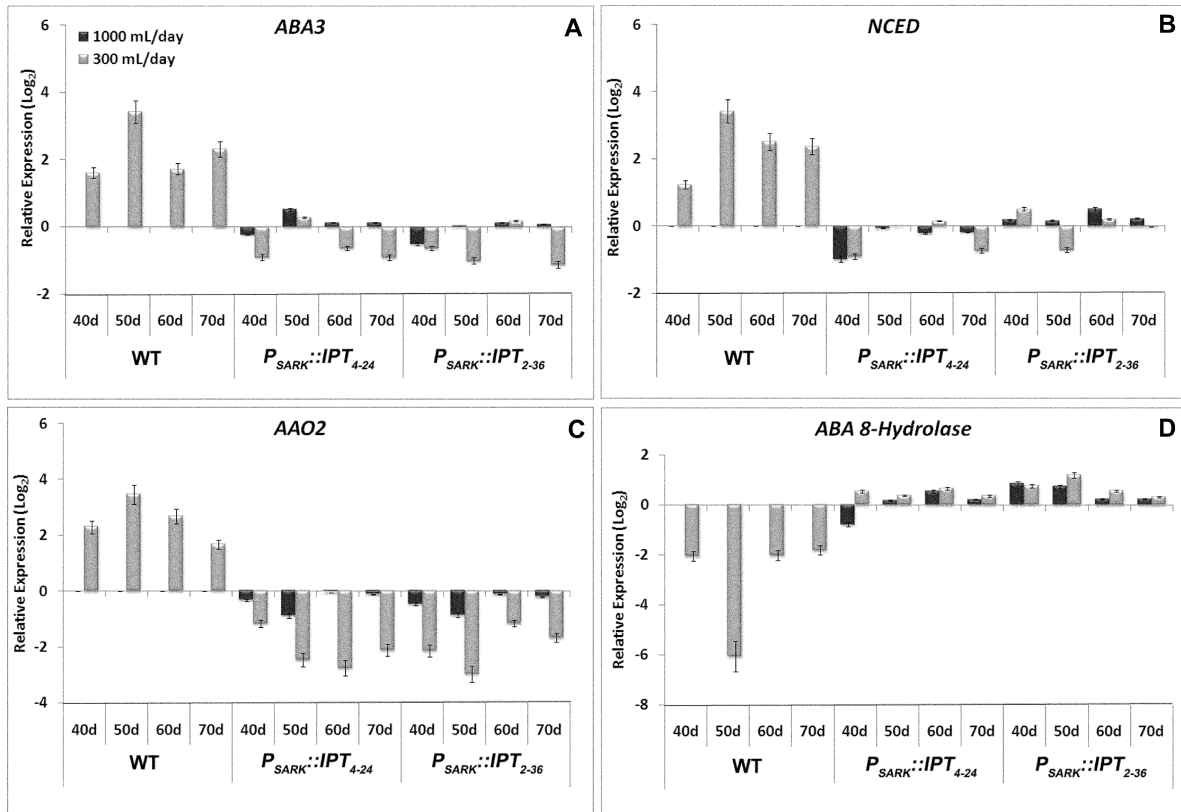

**Figure S1.** Relative changes in the expression of genes involved in ABA synthesis (*ABA3*, *NCED* and *AAO2*) and degradation (*ABA 8-hydrolase*). Changes were measured in WT and two transgenic lines expressing  $P_{SARK}::IPT$  grown during 70 d under optimal (1000 mL d<sup>-1</sup>) or reduced watering conditions (300 mL d<sup>-1</sup>). Two internal controls were used to normalize the data (18S and UBQ2). The reference sample used was WT grown under optimal watering conditions. Values are the Mean ± S.E. (n = 6).
