# Supplementary material
Source: PubMed Central journal article supplement (PMC2705023)
Supplement: pp.109.139378_2.pdf [file pp.109.139378_2.pdf]

**Figure S2**

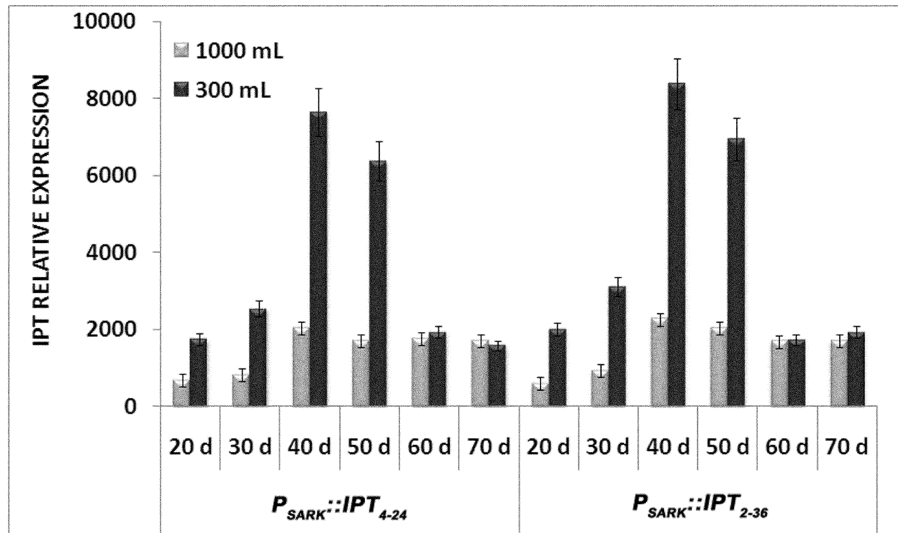

**Figure S2.** Relative expression of IPT changes by real time PCR in two transgenic lines expressing  $P_{SARK}::IPT$ . IPT expression was measured in plants grown under optimal (1000 mL d<sup>-1</sup>) (grey bars) or reduced watering conditions (300 mL d<sup>-1</sup>) (black bars) during 70 d. Values are the Mean  $\pm$  S.E. (n = 6).
